# Supplementary material for: Fire Weather Assessment of Future Changes in Fire Weather Conditions in the Attica Region
Source: MDPI journal article supplement (doi:10.3390/environsciproc2023026186), 2023-09-11
Supplement: s1 [file s1]

# Fire weather assessment of future changes in fire weather conditions in Attica region <sup>†</sup>

Nadia Politi \*, Diamando Vlachogiannis, Athanasios Sfetsos and Nikolaos Gounaris

Environmental Research Laboratory, NCSR “Demokritos”, 15341 Agia Paraskevi, Greece;  
mandy@ipta.demokritos.gr (D.V.); ts@ipta.demokritos.gr (A.S.); gounaris@ipta.demokritos.gr (N.G.)

\* Correspondence: nadiapol@ipta.demokritos.gr

<sup>†</sup> Presented at the 16th International Conference on Meteorology, Climatology and Atmospheric Physics—COMECAP 2023, Athens, Greece, 25–29 September 2023.

## Supplementary material

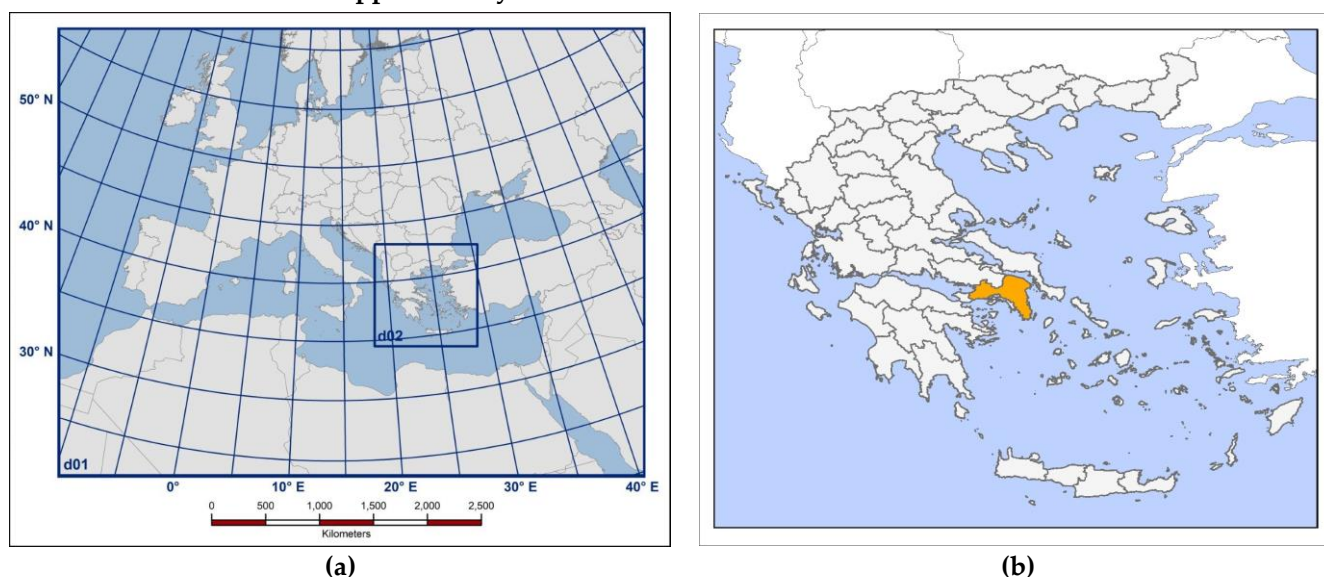

**Figure S1.** (a) Modelling Domains: d01 refers to the outermost domain of 20 km and d02 to the nested domain of 5 km (region of Greece). This figure is obtained by Politi et al 2022 [12]. (b) Area of Greece, in orange color for the Attica region.

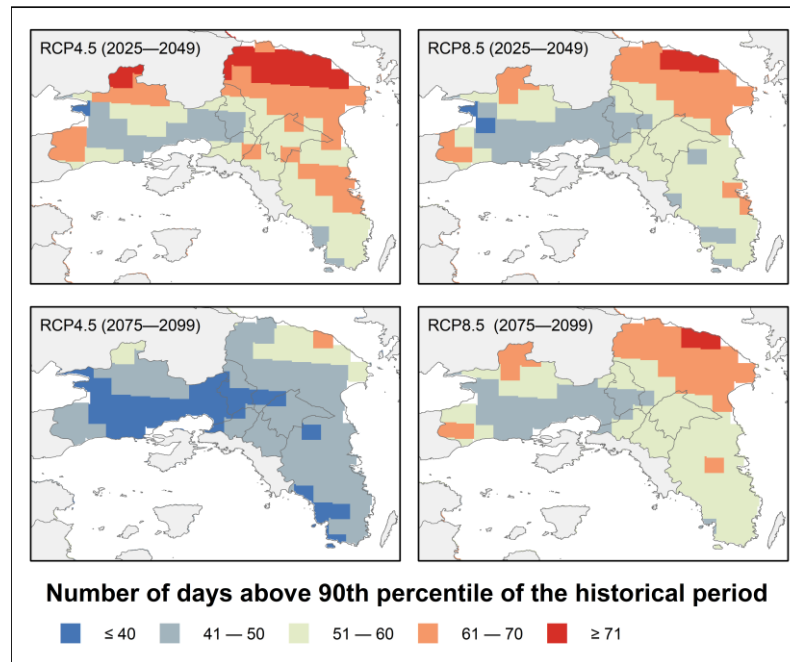

**Figure S2.** The number of days above 90th percentile (threshold value is set as 90th percentile of the historical period for the specific cell for all time periods) under the future emission scenarios in the near and far future periods for the Attica region.

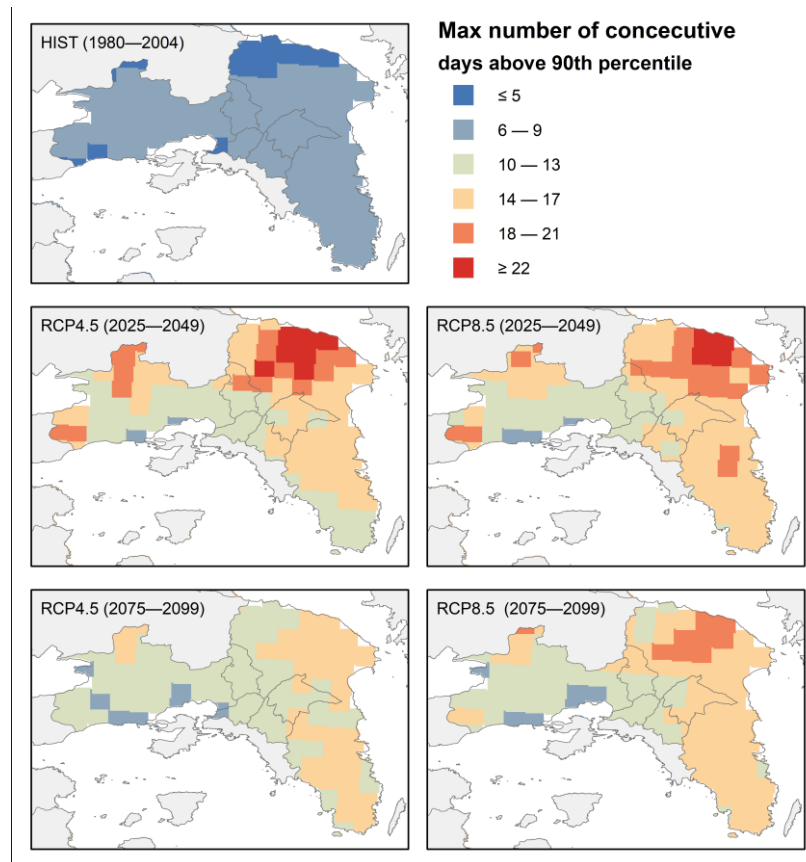

**Figure S3.** The maximum number with consecutive days above 90th percentile (threshold value is 90th percentile of the historical period for the specific cell) for historical period and RCP4.5 and RCP8.5 for the near and far future periods for the Attica region.
